# Supplementary material
Source: Springer Nature journal article supplement (http://www.springermedizin.de/resource/supplementary/12888_2009_718_MOESM5_ESM.pdf/9478276)
Supplement: MOESM5 [file 9478276]

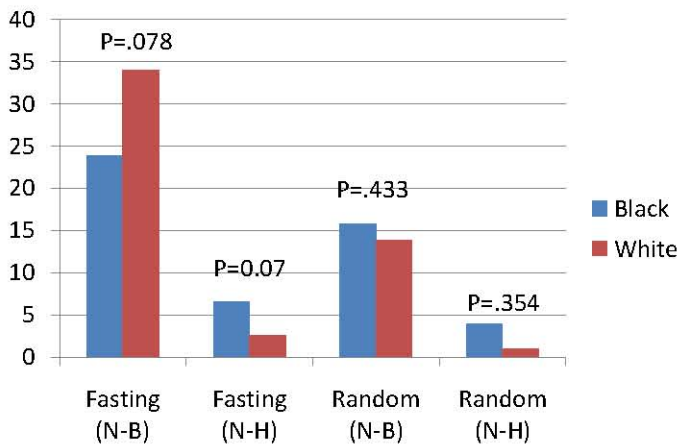

Abbreviations: N=Normal, B=Borderline, H=High

Fasting N-B: <100mg/dl to  $\geq$ 100mg/dl and <126mg/dl

Fasting N-H: <100mg/dl to  $\geq$ 126mg/dl

Random N-B: <140mg/dl to  $\geq$ 140mg/dl and <200mg/dl

Random N-H: <140mg/dl to  $\geq$ 200mg/dl
